# Supplementary material for: Insight into melting point differences of dinitroimidazoles and dinitropyrazoles from the perspective of intermolecular interactions
Source: Royal Society of Chemistry journal article supplement (doi:10.1039/d3cp05380f), 2024-01-01
Supplement: d3cp05380f1.pdf [file d3cp05380f1.pdf]

## Supporting Information

### Insight into melting point differences of dinitroimidazoles and dinitropyrazoles from the view of intermolecular interactions

Junnan Wu <sup>a,b</sup>, Siwei Song <sup>c</sup>, Xiujuan Qi <sup>d\*</sup>, Haijun Yang <sup>a\*</sup> and Yi Wang <sup>c\*</sup>

<sup>a</sup>School of Materials and Chemistry, Southwest University of Science and Technology, Mianyang, 621010, China.

<sup>b</sup>Institute of Chemical Materials, China Academy of Engineering Physics, Mianyang, 621000, China.

<sup>c</sup>School of Astronautics, Northwestern Polytechnical University, Xi'an, 710072, China.

<sup>d</sup>School of Chemistry and Chemical Engineering, Northwestern Polytechnical University, Xi'an, 710072, China.

### Table of contents

S1: SAPT calculations of three computational standards.

S2: BEC calculations for ten dinitroimidazole and dinitropyrazole molecules.

## S1: SAPT calculations of three computational standards.

### (A) Time comparison of three computational standards

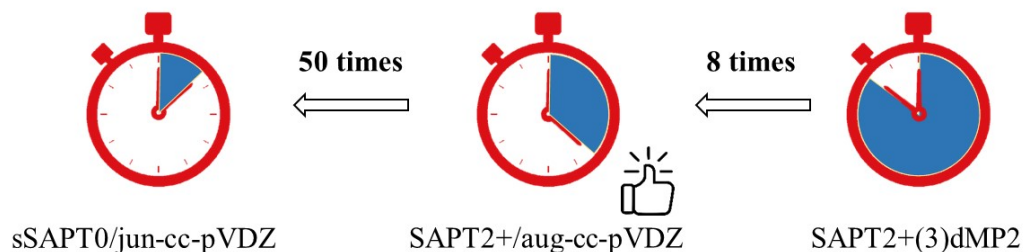

**Fig. S1.** Time comparison of three computational standards: Bronze(left), Silver(middle), Gold(right).

We used the same computing resources to measure the time consumption of three different computational standards (Bronze, Silver, Gold), as shown in Figure S1. For the binding energy calculation of the same dimer, the computational time for the gold standard is approximately 8 times than that of the silver standard, and the computational time for the silver standard is approximately 50 times than that of the copper standard. Generally, the computational time for the silver standard is acceptable.

### (B) Accuracy comparison of three computational standards

The SAPT calculation results of DNP-4 without structural optimization are presented in Table S1 – S4. Among which, the difference between the calculation results of the silver standard and the bronze standard is larger than that between the gold standard and the silver standard. In consideration of the balance of the computational costs and accuracy, we opted for the `SAPT2+/aug-cc-pVDZ` (Silver) standard.

**Table S1.** The ELECTRO binding energy in cluster of DNP-4. The unit of energy is kJ/mol.

| DIMER | Bronze-level | Silver-level | Gold-level | Silver - Bronze | Gold - Silver |
|-------|--------------|--------------|------------|-----------------|---------------|
| 1     | 5.400357     | 3.262513     | 3.739815   | -2.13784        | 0.477302      |
| 2     | -16.505      | -15.5157     | -14.9519   | 0.9893          | 0.5638        |
| 3     | -0.93439     | -5.46853     | -3.10123   | -4.53414        | 2.3673        |
| 4     | -4.36169     | -2.47186     | -3.04926   | 1.88983         | -0.5774       |
| 5     | -10.532      | -12.0941     | -9.76569   | -1.5621         | 2.32841       |
| 6     | -16.7205     | -13.3411     | -12.9895   | 3.3794          | 0.3516        |
| 7     | -4.36167     | -2.47185     | -3.04926   | 1.88982         | -0.57741      |
| 8     | -10.532      | -12.0941     | -9.76567   | -1.5621         | 2.32843       |

|    |          |          |          |          |          |
|----|----------|----------|----------|----------|----------|
| 9  | -24.2905 | -22.8991 | -21.5248 | 1.3914   | 1.3743   |
| 10 | -8.1276  | -6.72706 | -6.75112 | 1.40054  | -0.02406 |
| 11 | -10.2719 | -8.78813 | -8.28464 | 1.48377  | 0.50349  |
| 12 | -8.12762 | -6.72707 | -6.75114 | 1.40055  | -0.02407 |
| 13 | -16.5049 | -15.5157 | -14.9519 | 0.9892   | 0.5638   |
| 14 | 5.400362 | 3.262507 | 3.739805 | -2.13786 | 0.477298 |

**Table S2.** The EXCHANGE binding energy in cluster of DNP-4. The unit of energy is kJ/mol.

| DIMER | Bronze-level | Silver-level | Gold-level | Silver - Bronze | Gold - Silver |
|-------|--------------|--------------|------------|-----------------|---------------|
| 1     | 0.370237     | 0.485258     | 0.46098    | 0.115021        | -0.024278     |
| 2     | 13.35503     | 16.41993     | 15.88969   | 3.0649          | -0.53024      |
| 3     | 20.77027     | 21.95669     | 20.85773   | 1.18642         | -1.09896      |
| 4     | 2.957165     | 3.351602     | 3.195954   | 0.394437        | -0.155648     |
| 5     | 13.84872     | 16.94227     | 16.20303   | 3.09355         | -0.73924      |
| 6     | 9.494145     | 11.45021     | 10.98908   | 1.956065        | -0.46113      |
| 7     | 2.957167     | 3.351605     | 3.195957   | 0.394438        | -0.155648     |
| 8     | 13.84871     | 16.94226     | 16.20302   | 3.09355         | -0.73924      |
| 9     | 24.98392     | 28.18462     | 26.86316   | 3.2007          | -1.32146      |
| 10    | 11.06349     | 12.83167     | 12.26378   | 1.76818         | -0.56789      |
| 11    | 8.433219     | 9.898303     | 9.418889   | 1.465084        | -0.479414     |
| 12    | 11.06348     | 12.83166     | 12.26377   | 1.76818         | -0.56789      |
| 13    | 13.35503     | 16.41993     | 15.88969   | 3.0649          | -0.53024      |
| 14    | 0.370237     | 0.485258     | 0.46098    | 0.115021        | -0.024278     |

**Table S3.** The INDUCTION binding energy in cluster of DNP-4. The unit of energy is kJ/mol.

| DIMER | Bronze-level | Silver-level | Gold-level | Silver - Bronze | Gold - Silver |
|-------|--------------|--------------|------------|-----------------|---------------|
| 1     | -0.32158     | -0.2614      | -0.22303   | 0.06018         | 0.03837       |
| 2     | -4.11614     | -4.54441     | -2.98652   | -0.42827        | 1.55789       |
| 3     | -3.36175     | -3.27212     | -2.66216   | 0.08963         | 0.60996       |
| 4     | -1.26897     | -1.18383     | -0.95672   | 0.08514         | 0.22711       |
| 5     | -3.20636     | -3.8117      | -2.27335   | -0.60534        | 1.53835       |
| 6     | -2.32297     | -2.56033     | -1.94311   | -0.23736        | 0.61722       |
| 7     | -1.26897     | -1.18384     | -0.9567    | 0.08513         | 0.22714       |
| 8     | -3.20635     | -3.81171     | -2.27335   | -0.60536        | 1.53836       |
| 9     | -4.19468     | -4.66586     | -3.25148   | -0.47118        | 1.41438       |

|    |          |          |          |          |         |
|----|----------|----------|----------|----------|---------|
| 10 | -2.22523 | -2.34994 | -1.16669 | -0.12471 | 1.18325 |
| 11 | -1.51299 | -1.74678 | -1.20878 | -0.23379 | 0.538   |
| 12 | -2.22523 | -2.34991 | -1.16668 | -0.12468 | 1.18323 |
| 13 | -4.11614 | -4.5444  | -2.98654 | -0.42826 | 1.55786 |
| 14 | -0.32158 | -0.2614  | -0.22305 | 0.06018  | 0.03835 |

**Table S4.** The DISPERSION binding energy in cluster of DNP-4. The unit of energy is kJ/mol.

| DIMER | Bronze-level | Silver-level | Gold-level | Silver - Bronze | Gold - Silver |
|-------|--------------|--------------|------------|-----------------|---------------|
| 1     | -2.81717     | -3.58687     | -3.72735   | -0.7697         | -0.14048      |
| 2     | -15.1795     | -19.9831     | -20.5712   | -4.8036         | -0.5881       |
| 3     | -29.7586     | -34.821      | -35.2657   | -5.0624         | -0.4447       |
| 4     | -5.42273     | -6.89236     | -7.06001   | -1.46963        | -0.16765      |
| 5     | -15.3385     | -21.0313     | -21.8578   | -5.6928         | -0.8265       |
| 6     | -10.9908     | -15.0307     | -15.6197   | -4.0399         | -0.589        |
| 7     | -5.42273     | -6.89236     | -7.06002   | -1.46963        | -0.16766      |
| 8     | -15.3385     | -21.0313     | -21.8578   | -5.6928         | -0.8265       |
| 9     | -28.8778     | -38.485      | -39.904    | -9.6072         | -1.419        |
| 10    | -14.0213     | -18.6186     | -19.1737   | -4.5973         | -0.5551       |
| 11    | -10.4379     | -14.6768     | -15.4517   | -4.2389         | -0.7749       |
| 12    | -14.0213     | -18.6186     | -19.1737   | -4.5973         | -0.5551       |
| 13    | -15.1795     | -19.9831     | -20.5712   | -4.8036         | -0.5881       |
| 14    | -2.81717     | -3.58687     | -3.72735   | -0.7697         | -0.14048      |

### (C) The fitting results under Bronze medal standard

We calculated the binding energy in clusters for ten molecules under the bronze medal standard. The linear regression of the highest dimer binding energy and  $T_m$  (Fig. S2a), as well as the linear regression of the sum of the largest several binding energies and  $T_m$  (Fig. S2b), both perform relatively poorly compared to the silver standard. The energy difference between the bronze standard and the silver standard is consistently above 5 kJ/mol for each dimer's binding energy, which will be the main reason.

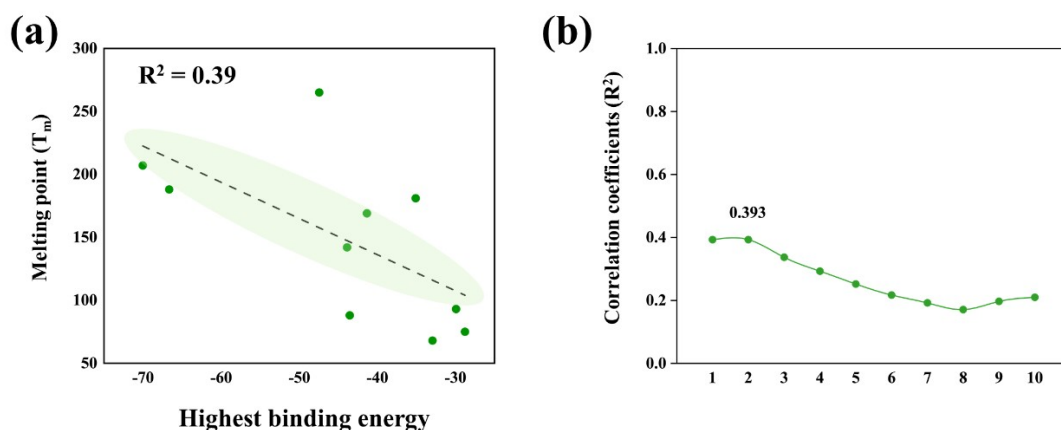

**Fig. S2** (a) Correlation between melting point ( $T_m$ ) and highest dimer binding energy; (b) Correlation coefficients ( $R^2$ ) of the linear analysis between the sum of the largest several binding energies and  $T_m$ .

#### (D) The difference of key values between SAPT0 and SAPT2+

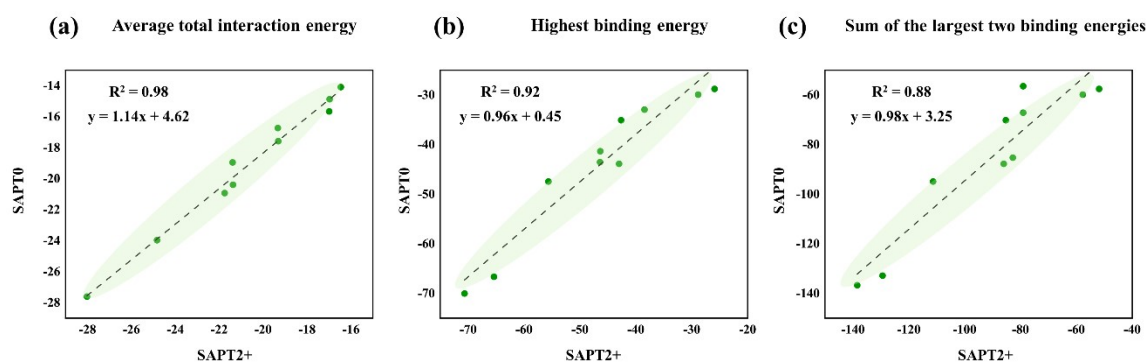

**Fig. S3** (a) Average total interaction energy ( $E_{avg}$ ) of SAPT0 and SAPT2+; (b) Highest binding energy of SAPT0 and SAPT2+; (c) Sum of the largest two binding energies of SAPT0 and SAPT2+.

In the fitting process, three crucial data points (average total interaction energy, highest binding energy and sum of the largest two binding energies) were chosen to compare the outcomes of SAPT0 and SAPT2+. We conducted a linear fitting of the results obtained from SAPT0 and SAPT2+ calculations. Remarkably, for the  $E_{avg}$  value (Fig S3 a), the  $R^2$  is as high as 0.98, indicating that it is justifiable to convert the results from SAPT0 to SAPT2+ using a specific formula.

When considering highest binding energy (Fig. S3 b), it was observed that the values derived from SAPT0 were mostly lower than those obtained from SAPT2+, with a difference ranging from 5 to 10  $\text{kJ mol}^{-1}$  and  $R^2$  decreased to 0.92.

When considering sum of the largest two binding energies (Fig. S3 c), it was observed that

SAPT0 consistently yielded noticeably lower values than SAPT2+ in DNI-1, DNP-1, and DNP-4, with differences exceeding  $20 \text{ kJ mol}^{-1}$ , rendering an  $R^2$  value of 0.88 unacceptable.

## S2: BEC calculations for ten dinitroimidazole and dinitropyrazole molecules.

The BEC calculation results for all molecules are presented in Table S5 -S14. The total energy of dimer in Fig.3 is the sum of electro, exchange, induction and dispersion energy of dimer. The  $E_{avg}$  in Fig.3 is the average of the total energy of dimer.

**Table S5.** The binding energy in cluster of DNI-1. The unit of energy is kJ/mol.

| DIMER | ELECTRO  | EXCHANGE | INDUCTION | DISPERSION |
|-------|----------|----------|-----------|------------|
| 1     | 1.230839 | 0.327304 | -0.29456  | -2.74815   |
| 2     | -8.40958 | 19.91597 | -4.78642  | -25.5495   |
| 3     | -0.93128 | 19.59501 | -5.10485  | -21.6021   |
| 4     | -14.127  | 15.5527  | -4.44019  | -22.0339   |
| 5     | -59.4513 | 69.27462 | -29.3577  | -36.1066   |
| 6     | -15.8907 | 9.37217  | -3.21696  | -11.8939   |
| 7     | -4.15908 | 2.682918 | -1.81489  | -6.60416   |
| 8     | -0.93129 | 19.59498 | -5.10487  | -21.6021   |
| 9     | -14.127  | 15.55272 | -4.4402   | -22.0339   |
| 10    | -13.4499 | 19.29629 | -6.74325  | -14.1829   |
| 11    | -8.40958 | 19.91597 | -4.78645  | -25.5495   |
| 12    | 1.230834 | 0.327304 | -0.29456  | -2.74815   |
| 13    | -59.4513 | 69.27462 | -29.3577  | -36.1066   |
| 14    | -4.15907 | 2.682901 | -1.81483  | -6.60415   |
| 15    | -13.4498 | 19.29628 | -6.74325  | -14.1829   |

**Table S6.** The binding energy in cluster of DNI-2. The unit of energy is kJ/mol.

| DIMER | ELECTRO  | EXCHANGE | INDUCTION | DISPERSION |
|-------|----------|----------|-----------|------------|
| 1     | -18.2369 | 23.87636 | -6.7072   | -28.1576   |
| 2     | -8.03066 | 3.798876 | -1.55766  | -6.54774   |
| 3     | -29.9834 | 36.49029 | -9.72308  | -49.2929   |
| 4     | -88.9089 | 118.1932 | -47.3984  | -52.5307   |
| 5     | -16.4721 | 16.26616 | -4.00481  | -24.0482   |
| 6     | 5.433253 | 2.292254 | -1.35743  | -7.19682   |
| 7     | -85.9227 | 115.7017 | -45.3125  | -52.2643   |

|    |          |          |          |          |
|----|----------|----------|----------|----------|
| 8  | -12.4516 | 31.95687 | -6.68068 | -36.8984 |
| 9  | -21.4567 | 12.51603 | -2.70826 | -17.4901 |
| 10 | -11.3329 | 9.072323 | -2.65353 | -9.80028 |
| 11 | 4.686325 | 6.915105 | -2.25963 | -5.9195  |
| 12 | -6.00866 | 2.731554 | -1.42261 | -5.42677 |

**Table S7.** The binding energy in cluster of DNI-3. The unit of energy is kJ/mol.

| DIMER | ELECTRO  | EXCHANGE | INDUCTION | DISPERSION |
|-------|----------|----------|-----------|------------|
| 1     | -11.3329 | 9.072323 | -2.65353  | -9.80028   |
| 2     | -3.42382 | 4.598126 | -2.71481  | -7.03421   |
| 3     | 1.700667 | 0.458169 | -0.39379  | -3.95445   |
| 4     | 2.85682  | 2.388816 | -0.93582  | -6.34066   |
| 5     | -17.9406 | 17.22891 | -4.8262   | -19.7271   |
| 6     | -82.1374 | 101.3388 | -45.6863  | -38.9026   |
| 7     | -10.615  | 26.51716 | -5.88922  | -35.096    |
| 8     | -14.7228 | 20.30564 | -5.36984  | -28.0911   |
| 9     | -14.8952 | 20.22005 | -3.8049   | -24.8866   |
| 10    | -17.9406 | 17.22892 | -4.82627  | -19.7271   |
| 11    | -12.9396 | 11.88902 | -2.56324  | -17.7299   |
| 12    | -79.1469 | 98.81235 | -42.4482  | -41.2006   |
| 13    | -3.42382 | 4.598104 | -2.71485  | -7.0342    |

**Table S8.** The binding energy in cluster of DNI-4. The unit of energy is kJ/mol.

| DIMER | ELECTRO  | EXCHANGE | INDUCTION | DISPERSION |
|-------|----------|----------|-----------|------------|
| 1     | -12.0198 | 14.75289 | -3.2491   | -11.068    |
| 2     | 4.400382 | 3.475591 | -1.1814   | -6.4732    |
| 3     | -8.51244 | 24.89786 | -6.17814  | -32.3942   |
| 4     | -3.97422 | 2.944825 | -1.8763   | -6.97584   |
| 5     | -0.10501 | 3.926853 | -0.93034  | -6.60641   |
| 6     | -28.6388 | 28.19601 | -9.1078   | -24.3668   |
| 7     | -28.3434 | 29.3081  | -9.41599  | -28.2119   |
| 8     | -30.6867 | 26.28607 | -7.32366  | -31.273    |
| 9     | -16.3007 | 21.52474 | -5.10233  | -25.1923   |
| 10    | -1.06601 | 5.23362  | -3.09965  | -8.92222   |
| 11    | -12.6437 | 8.191615 | -2.68794  | -8.25044   |



|    |          |          |          |          |
|----|----------|----------|----------|----------|
| 12 | -30.6867 | 26.28611 | -7.32361 | -31.273  |
| 13 | -8.51244 | 24.89787 | -6.17811 | -32.3942 |
| 14 | -16.3007 | 21.52474 | -5.10226 | -25.1923 |

**Table S9.** The binding energy in cluster of DNI-5. The unit of energy is kJ/mol.

| DIMER | ELECTRO  | EXCHANGE | INDUCTION | DISPERSION |
|-------|----------|----------|-----------|------------|
| 1     | -0.47413 | 1.351718 | -0.15885  | -4.58691   |
| 2     | -0.47413 | 1.351717 | -0.15884  | -4.58691   |
| 3     | -15.855  | 21.46507 | -7.05716  | -16.7868   |
| 4     | -15.5683 | 15.73331 | -3.62743  | -22.1585   |
| 5     | -1.6704  | 9.40812  | -1.28527  | -13.4787   |
| 6     | 1.637102 | 7.073546 | -1.87549  | -15.0174   |
| 7     | -20.5978 | 29.49924 | -7.62028  | -28.4432   |
| 8     | -1.67039 | 9.408109 | -1.28525  | -13.4787   |
| 9     | 1.637111 | 7.073548 | -1.87547  | -15.0174   |
| 10    | -15.855  | 21.46504 | -7.05713  | -16.7868   |
| 11    | -21.4174 | 20.16044 | -5.04712  | -22.5426   |
| 12    | -20.5977 | 29.49923 | -7.62031  | -28.4432   |
| 13    | -21.4174 | 20.1605  | -5.04712  | -22.5426   |
| 14    | -15.5683 | 15.7333  | -3.62741  | -22.1585   |

**Table S10.** The binding energy in cluster of DNI-6. The unit of energy is kJ/mol.

| DIMER | ELECTRO  | EXCHANGE | INDUCTION | DISPERSION |
|-------|----------|----------|-----------|------------|
| 1     | -11.7535 | 16.85764 | -4.42097  | -13.5892   |
| 2     | -11.6503 | 9.916474 | -3.34968  | -15.0222   |
| 3     | 4.181835 | 3.488767 | -1.76358  | -7.95628   |
| 4     | -5.53348 | 8.687221 | -3.29429  | -14.8031   |
| 5     | -11.6503 | 9.916469 | -3.34968  | -15.0222   |
| 6     | -24.8085 | 18.33237 | -6.22732  | -13.2155   |
| 7     | 4.181849 | 3.488762 | -1.76356  | -7.95628   |
| 8     | -11.7535 | 16.85765 | -4.42097  | -13.5892   |
| 9     | -7.39676 | 25.62401 | -6.49727  | -35.5071   |
| 10    | -5.53348 | 8.687222 | -3.29432  | -14.8031   |
| 11    | -5.3944  | 16.95653 | -4.85948  | -25.8573   |
| 12    | -5.39441 | 16.95657 | -4.85953  | -25.8573   |

|    |          |          |          |          |
|----|----------|----------|----------|----------|
| 13 | -7.39675 | 25.62402 | -6.49727 | -35.5072 |
| 14 | -24.8085 | 18.33237 | -6.22728 | -13.2155 |

**Table S11.** The binding energy in cluster of DNP-1. The unit of energy is kJ/mol.

| DIMER | ELECTRO  | EXCHANGE | INDUCTION | DISPERSION |
|-------|----------|----------|-----------|------------|
| 1     | -41.1522 | 43.98907 | -17.9013  | -27.5534   |
| 2     | 4.648337 | 2.019233 | -0.82619  | -5.3786    |
| 3     | -41.1522 | 43.98908 | -17.9013  | -27.5534   |
| 4     | -11.5175 | 21.43873 | -3.67792  | -25.5826   |
| 5     | -0.56373 | 0.671296 | -0.21217  | -3.66769   |
| 6     | -19.8107 | 28.39436 | -6.09518  | -36.111    |
| 7     | -11.5175 | 21.4388  | -3.67789  | -25.5826   |
| 8     | -15.5427 | 17.4991  | -3.71336  | -25.3209   |
| 9     | -2.17905 | 7.265884 | -1.22814  | -12.7962   |
| 10    | -15.5427 | 17.49914 | -3.71325  | -25.3209   |
| 11    | -3.41405 | 7.89912  | -1.35148  | -13.4296   |
| 12    | -19.8107 | 28.39435 | -6.09509  | -36.111    |
| 13    | -3.41404 | 7.899123 | -1.35153  | -13.4296   |

**Table S12.** The binding energy in cluster of DNP-2. The unit of energy is kJ/mol.

| DIMER | ELECTRO  | EXCHANGE | INDUCTION | DISPERSION |
|-------|----------|----------|-----------|------------|
| 1     | -14.0432 | 18.75868 | -4.03497  | -24.6857   |
| 2     | -11.6548 | 11.61819 | -2.54749  | -13.4671   |
| 3     | -40.6864 | 42.99877 | -19.0329  | -29.633    |
| 4     | -28.5734 | 35.86662 | -15.1987  | -24.7585   |
| 5     | -12.4316 | 26.44399 | -3.76744  | -24.3457   |
| 6     | -14.0432 | 18.7587  | -4.03499  | -24.6857   |
| 7     | -8.04272 | 10.75347 | -2.49539  | -15.0666   |
| 8     | -7.63007 | 8.941291 | -2.14726  | -13.2633   |
| 9     | -14.9437 | 23.77617 | -6.07132  | -20.1552   |
| 10    | 1.322282 | 4.102119 | -0.74882  | -8.90157   |
| 11    | 0.126042 | 15.03299 | -3.32379  | -26.4733   |
| 12    | -12.4316 | 26.444   | -3.76744  | -24.3458   |
| 13    | -8.04273 | 10.75345 | -2.49538  | -15.0666   |

**Table S13.** The binding energy in cluster of DNP-3. The unit of energy is kJ/mol.

| DIMER | ELECTRO  | EXCHANGE | INDUCTION | DISPERSION |
|-------|----------|----------|-----------|------------|
| 1     | -24.1    | 28.28391 | -6.94145  | -24.607    |
| 2     | 0.776057 | 3.001439 | -0.89264  | -5.46086   |
| 3     | 4.101448 | 7.722697 | -2.38303  | -16.2587   |
| 4     | 4.697791 | 3.501146 | -1.12624  | -6.95349   |
| 5     | 6.295849 | 7.183608 | -1.99507  | -13.2392   |
| 6     | -23.8731 | 16.79265 | -7.67994  | -21.5631   |
| 7     | -12.2622 | 21.7227  | -3.95151  | -30.3046   |
| 8     | -20.2868 | 19.53356 | -5.34355  | -21.2052   |
| 9     | -2.3238  | 24.30708 | -6.27527  | -31.9576   |
| 10    | -3.07124 | 11.84708 | -3.08055  | -14.5859   |
| 11    | -41.3132 | 44.39527 | -16.1957  | -21.8584   |
| 12    | -23.873  | 16.79265 | -7.68001  | -21.5631   |
| 13    | -44.2071 | 30.28846 | -12.3096  | -20.1731   |
| 14    | -41.3133 | 44.3953  | -16.1957  | -21.8584   |

**Table S14.** The binding energy in cluster of DNP-4. The unit of energy is kJ/mol.

| DIMER | ELECTRO  | EXCHANGE | INDUCTION | DISPERSION |
|-------|----------|----------|-----------|------------|
| 1     | 3.464689 | 0.58243  | -0.31707  | -3.85917   |
| 2     | -20.1518 | 29.23541 | -7.69087  | -24.6646   |
| 3     | -2.06612 | 4.103386 | -1.25624  | -7.62554   |
| 4     | -6.20785 | 23.33565 | -3.28373  | -36.2956   |
| 5     | -16.6636 | 23.83426 | -4.73533  | -24.1155   |
| 6     | -2.06612 | 4.10339  | -1.25623  | -7.62554   |
| 7     | -15.2225 | 13.76345 | -3.35024  | -16.4145   |
| 8     | -16.6636 | 23.83424 | -4.7353   | -24.1155   |
| 9     | -6.81594 | 11.74346 | -2.03401  | -18.1855   |
| 10    | -24.0343 | 28.8828  | -4.68733  | -38.6063   |
| 11    | -6.81594 | 11.74346 | -2.03405  | -18.1855   |
| 12    | -7.99134 | 11.30739 | -1.88169  | -15.4119   |
| 13    | -20.1518 | 29.23541 | -7.6908   | -24.6646   |
| 14    | 3.46469  | 0.582429 | -0.31702  | -3.85917   |
